# Supplementary material for: Suppression of Escherichia coli O157:H7 by Dung Beetles (Coleoptera: Scarabaeidae) Using the Lowbush Blueberry Agroecosystem as a Model System
Source: PubMed Central journal article supplement (PMC4388438; doi:10.1371/journal.pone.0120904), 2015-04-07
Supplement: pone.0120904.s001.pdf [file pone.0120904.s001.pdf]

**Table S1. Field Experiment- Reduction in *E. coli* levels over time.**

| <b>Treatment group</b> | <b>Average proportion reductions of <i>E. Coli</i> O157:H7 left on treatment groups in field inoculation study at different time periods</b> |       |       |       |
|------------------------|----------------------------------------------------------------------------------------------------------------------------------------------|-------|-------|-------|
|                        | 2hrs                                                                                                                                         | 24hrs | 48hrs | 72hrs |
| Positive control       | 0                                                                                                                                            | 0.902 | 0.989 | 0.999 |
| Scat inoculation       | 0                                                                                                                                            | 0.281 | 0.450 | 0.671 |

**Table S2. Table of raw data for laboratory experiment 1-Dung beetles drive number of *E. coli* colonies**

| <b>Treatment type</b>                      | <b>Levels of <i>E. Coli</i> O157:H7 (log CFU/g) present within each soil treatment from lab experiment 1</b> |
|--------------------------------------------|--------------------------------------------------------------------------------------------------------------|
|                                            | <b>Average</b>                                                                                               |
| <b>Beetles + <i>E. coli</i> O157:H7</b>    | 3.26                                                                                                         |
| <b><i>E. coli</i> O157:H7 + No Beetles</b> | 4.08                                                                                                         |

**Table S3. Table of raw data for laboratory experiment 2- Dung beetles affect number of *E. coli* colonies.**

| <b>Treatment type</b>                              | <b>Levels of <i>E. Coli</i> O157:H7 (log CFU/g) present within each soil treatment from lab experiment 2</b> | <b>Average</b> |
|----------------------------------------------------|--------------------------------------------------------------------------------------------------------------|----------------|
| <b>Beetles +<br/><i>E. coli</i><br/>O157:H7</b>    |                                                                                                              | 4.65           |
| <b><i>E. coli</i><br/>O157:H7 +<br/>No Beetles</b> |                                                                                                              | 4.95           |
